# Supplementary material
Source: publisher site journal article supplement (https://www.dovepress.com/article/590419)
Supplement: Supplementary file 1 [file 590419%20Supplementary%20Material.docx]

**Appendix S1. Saturation Tracking Table**

| **Interview No.** | **Participant Type** | **New Core Themes Emerging** | **Theme I System & Governance Barriers** | **Theme II Behavioral & Accessibility Barriers** | **Theme III Opportunities & Strategies** | **Saturation Status** | **Notes** |
| --- | --- | --- | --- | --- | --- | --- | --- |
| Int.#1 | Health Commission leadership | Fiscal constraints; data silos; willingness concerns | Y (1) | N (0) | N (0) | Exploring | Introduced macro-level structural challeng |
| Int.#2 | EMS expert | Physical accessibility; dispatch-system disconnect | Y (2) | Y (1) | N (0) | Exploring | Highlighted operational failures and fragmented AED information. |
| Int.#3 | Red Cross Socity staff | Non-unified signage; legal anxiety (Good Man Law) | Y (3) | Y (2) | N (0) | Exploring | Provided concrete examples of visibility and recognition issues. |
| ... | ... | ... | ... | ... | ... | ... | ... |
| Int.#10 | Venue manager | Long-term maintenance burden | Y (4) | Y (3) | Y (1) | Approaching | First explicit articulation of “cannot maintain” / sustainability issue. |
| Int.#11 | Health Commission leadership | None | Y (4) | Y (3) | Y (1) | Confirming | Repetition of existing themes; no new insights. |
| Int.#12 | Academic expert | Concept of “mobile AED” (e.g., taxis, couriers, drones) | Y (4) | Y (3) | Y (2) | Exploring | First introduction of innovative mobile AED deployment strategy. |
| ... | ... | ... | ... | ... | ... | ... | ... |
| Int.#38 | Community volunteer | None | Y (5) | Y (5) | Y (4) | Saturated | No new themes; all core categories fully repeated and validated. |
| Int.#39 | Trained layperson | None | Y (5) | Y (5) | Y (4) | Saturated | Continued interviews showed full redundancy of thematic content. |
| Int.#42 | Health Commission leadership | None | Y (5) | Y (5) | Y (4) | Saturated | Final confirmation; total N=42 interviews; saturation demonstrated. |

**Appendix S2. Consolidated Criteria for Reporting Qualitative Research (COREQ) Checklist**

| **Domain** | **Subdomain** | **Item No.** | **Item** | **Guide question/description** | **Reported on page No.** | **How this study addressed the item** |
| --- | --- | --- | --- | --- | --- | --- |
| **1.Research team and reflexivity** | Personal characteristics | 1 | Interviewer/facilitator | Which author(s) conducted the interview or focus group? | 7 | Interviews were conducted by members of the research team, including a PhD candidate (Y.G.) and an MPH researcher (X.Z.). |
|  |  | 2 | Credentials | What were the researcher’s credentials? | 7 | The research team included a PhD candidate (Y.G.) and an MPH researcher (X.Z.). |
|  |  | 3 | Occupation | What was their occupation at the time of the study? | 7 | At the time of the study, the interviewers were academic/public health researchers engaged in AED and public health policy research. This is inferred from the researcher description and should be aligned with the wording used in the manuscript. |
|  |  | 4 | Gender | Was the researcher male or female? | Not reported | Not explicitly reported in the current materials. Add this to the Methods if available. |
|  |  | 5 | Experience and training | What experience or training did the researcher have? | 7 | The researchers had prior experience in AED optimization and public health policy. Reflexivity was further addressed through standardized interview guides, independent coding, reflexive memos, and consensus meetings. |
|  | Relationship with participants | 6 | Relationship established | Was a relationship established prior to study commencement? | 7 | No prior relationship with participants existed before the study. |
|  |  | 7 | Participant knowledge of the interviewer | What did the participants know about the researcher? | 7 | Participants were informed of the study during recruitment and consent, but the current materials do not explicitly specify what they were told about interviewer background beyond the research purpose. Add one sentence in Methods if available. |
|  |  | 8 | Interviewer characteristics | What characteristics were reported about the interviewer/facilitator? | 7 | Potential expectancy bias was acknowledged, and reflexivity was addressed through standardized interview guides, independent coding, reflexive memos, and consensus meetings to reduce undue researcher influence. |
| **2.Study design** | Theoretical framework | 9 | Methodological orientation and theory | What methodological orientation underpinned the study? | 5,8 | The study used semi-structured qualitative interviews and thematic analysis combining inductive and deductive coding, informed by an interpretivist/constructivist orientation. |
|  | Participant selection | 10 | Sampling | How were participants selected? | 6-7 | A purposive sampling strategy combined with snowball sampling was used to recruit participants directly involved in PAD-related planning, implementation, coordination, or operational support. |
|  |  | 11 | Method of approach | How were participants approached? | 6-7 | Not explicitly reported in the current materials. A suitable wording, if accurate, would be: participants were approached through institutional contacts and follow-up invitations. |
|  |  | 12 | Sample size | How many participants were in the study? | 6-7,9 | A total of 42 stakeholders participated in the study. |
|  |  | 13 | Non-participation | How many people refused to participate or dropped out? Reasons? | 9/refusals not reported | Not explicitly reported in the current materials. Report as “not recorded” unless you have these data. |
|  | Setting | 14 | Setting of data collection | Where was the data collected? | 6-7 | Interviews were conducted in participants’ workplaces or offices, at times convenient to participants. |
|  |  | 15 | Presence of non-participants | Was anyone else present besides the participants and researchers? | Not reported | Not explicitly reported in the current materials. Add only if clearly documented. |
|  |  | 16 | Description of sample | What are the important characteristics of the sample? | 7,9 | The sample included 42 individual stakeholders: 16 health administrative or institutional officials, 15 operational or technical support personnel, and 11 venue managers or instructors involved in prehospital emergency training. Sex distribution was 17 women and 25 men, and the mean age was 43.74 years. |
|  | Data collection | 17 | Interview guide | Were questions, prompts, or guides provided? Was it pilot tested? | 7 | A semi-structured interview guide was developed, piloted, and refined through training and role-play before formal interviewing. |
|  |  | 18 | Repeat interviews | Were repeat interviews carried out? | 9 | Repeat interviews were not reported in the current materials. Unless they occurred, this item can be stated as “No repeat interviews were conducted.” |
|  |  | 19 | Audio/visual recording | Did the research use audio or visual recording? | 8 | Interviews were audio-recorded using digital recorders and then transcribed verbatim. |
|  |  | 20 | Field notes | Were field notes made during and/or after the interview? | 8 | Reflexive memos were reported as part of trustworthiness procedures. If field notes were separately taken, specify this in the Methods; otherwise state that reflexive memos were used. |
|  |  | 21 | Duration | What was the duration of the interviews? | 8 | Interviews typically lasted 30–40 minutes. |
|  |  | 22 | Data saturation | Was data saturation discussed? | 8 | Data collection continued iteratively until saturation. Recurring patterns across stakeholder categories were observed by interview #38, and additional interviews were conducted to confirm saturation stability, with final confirmation at interview #42. |
|  |  | 23 | Transcripts returned | Were transcripts returned to participants for comment and/or correction? | 8 | Transcripts were not returned to participants for member checking. |
| **3.Analysis and findings** | Data analysis | 24 | Number of data coders | How many data coders coded the data? | 8 | Two researchers independently reviewed and coded the transcripts. |
|  |  | 25 | Description of the coding tree | Did authors provide a description of the coding tree? | 8,21-23 | A shared codebook was developed and refined through iterative discussion. The thematic structure organized by SEM levels was summarized in Table 2. If available, add a brief coding tree or note that it is available on request. |
|  |  | 26 | Derivation of themes | Were themes identified in advance or derived from the data? | 8 | Themes were generated through a combination of inductive and deductive coding, then refined iteratively through team discussion. |
|  |  | 27 | Software | What software was used to manage the data? | 8 | NVivo 11 (QSR International) was used to organize and code the data. |
|  |  | 28 | Participant checking | Did participants provide feedback on the findings? | 8 | Participant checking of final findings was not reported. Unless you conducted this, state “Participants did not provide feedback on the final themes/findings.” |
|  | Reporting | 29 | Quotations presented | Were participant quotations presented to illustrate the themes/findings? Was each quotation identified? | 9-13, 21-23 | The manuscript presents rich illustrative quotations identified by numeric participant labels and venue contexts, and Table 2 links themes, stakeholder groups, and example quotations. |
|  |  | 30 | Data and findings consistent | Was there consistency between the data presented and the findings? | 9-13, 21-23 | The quotations and examples presented in the manuscript substantiate the reported themes, including fear of causing harm, legal uncertainty, cost burdens, governance fragmentation, temporal inaccessibility, and mobile AED strategies. |
|  |  | 31 | Clarity of major themes | Were major themes clearly presented in the findings? | 9-14, 23 | Major themes were clearly organized across individual, organizational, environmental, and system levels, together with identified opportunities and strategies. |
|  |  | 32 | Clarity of minor themes | Is there a description of diverse cases or discussion of minor themes? | 9-14 | The study reported theme development, stakeholder variation, and saturation tracking. If the manuscript contains deviant cases or less prominent subthemes, they should be explicitly signposted; otherwise this item may be described as only partially addressed. |

**Key learning points**

**What is already known**

- Early defibrillation dramatically improves OHCA survival, yet AED utilisation in China remains extremely low due to limited accessibility and low bystander engagement.
- International evidence shows that AED deployment gaps often stem from high costs, non-24-hour venue access, and spatial mismatches between AED locations and OHCA risk hotspots.
- Bystander intervention is frequently constrained by the fear of causing harm or facing legal liability, resulting in the well-documented “know-how but do not dare to act” dilemma.
- Prior research has largely relied on quantitative spatial analyses, with limited exploration of the structural, organisational, and systemic conditions that determine whether AEDs can actually be accessed and used.

**What this study adds**

- This study identifies previously underexamined structural barriers-including fiscal unsustainability and fragmented management platforms-that create “data silos” and prevent evidence-based AED planning.
- It highlights a critical “implementation gap” in which AEDs are installed but remain functionally inaccessible due to maintenance failures, restricted operating hours, and a lack of integration with EMS dispatch systems.
- By synthesising insights from multiple stakeholder groups, the study proposes a system-level optimisation pathway centred on a unified, government-led AED information platform, innovative mobile AED strategies (e.g., taxis, couriers, drones), and strengthened legal and motivational mechanisms to bridge the gap between device availability and bystander action.

**Reference**

Christopher M. Smith, Sarah N. Lim Choi Keung, Mohammed O. Khan, Theodoros N. Arvanitis, Rachael Fothergill, Christopher Hartley-Sharpe, Mark H. Wilson, Gavin D. Perkins, Barriers and facilitators to public access defibrillation in out-of-hospital cardiac arrest: a systematic review, European Heart Journal - Quality of Care and Clinical Outcomes, Volume 3, Issue 4, October 2017, Pages 264-273, https://doi.org/10.1093/ehjqcco/qcx023
